# Supplementary material for: IL-4 and helminth infection downregulate MINCLE-dependent macrophage response to mycobacteria and Th17 adjuvanticity
Source: eLife. 2023 Feb 8;12:e72923. doi: 10.7554/eLife.72923 (PMC9908076; doi:10.7554/eLife.72923)
Supplement: Figure 1—source data 1. [file elife-72923-fig1-data1.xlsx]

## Sheet: Figure 1a
Figure 1A
Mincle expression on BMM
fold change relative to unstimulated control
6h	- IL-4								+ IL-4
TDB	1.14185	1.24159	0.896174	0.826444	1.99034	1.77025	1.81578	1.63702	0.201099	0.20638	0.145728	0.154665	0.296584	0.299422	0.438447	0.516076
BCG	19.6317	19.0516	18.9431	17.8913	16.3131	16.9433	16.1351	15.9769	12.5364	12.0524	10.4027	10.1061	10.0907	9.75413	9.41437	8.64722
24h
TDB	26.7931	32.1604	20.398	15.6421	25.5326	17.6179	34.5148	34.8981	3.70567	3.17229	1.84277	3.21131	2.74951	3.63867	5.34023	5.47171
BCG	321.493	272.323	291.863	391.427	154.732	149.372	145.59	123.397	159.213	167.456	183.442	175.131	138.892	85.0471	154.068	176.406
48h	w/o								+ IL-4
TDB	83.0204	56.9585	47.2346	66.6359	78.6452	76.1253	102.792	117.159		2.50713		2.81958	5.7167	5.40788	12.9302	17.2391
BCG	570.662	609.18	492.442	513.246	299.138	320.9	331.7	327.303	371.476	377.696	401.523	365.435	213.946	240.508	255.734	225.699

## Sheet: Figure 1b
Figure 1B
Dectin-2 expression on BMM
fold change relative to unstimulated control
6h	- IL-4								+ IL-4
TDB	0.611272	0.468592	0.518929	0.504507	0.917416	0.594263	0.646667	0.640669	0.234194	0.230984	0.210141	0.150298	0.257564	0.253104	0.298688	0.357256
BCG	2.09372	1.91304	1.75425	1.57033	1.66509	1.80907	1.58935	1.85772	0.613779	0.660642	0.415761	0.471832	0.604165	0.674717	0.674416	0.575918
24h
TDB	1.67216	2.29518	1.11837	0.729472	2.04725	1.81221	3.48671	3.40035	0.362375	0.264572	0.218233	0.365049	0.560569	0.581032	0.893359	1.01679
BCG	20.8126	18.5193	16.5683	17.8492	15.5703	14.7831	15.6772	19.944	10.7455	12.5626	9.5213	8.96852	8.9362	6.70199	15.7273	14.2965
48h
TDB	7.86411	4.58252	3.15428	4.50206	16.9304	16.6988	31.9992	33.1219		1.0093		1.41171	5.93686	6.26249	8.44624	10.2678
BCG	63.6116	65.5345	42.8106	51.3096	40.9083	38.393	53.7106	55.9909	17.6873	21.8081	13.722	17.3377	35.5593	32.1535	49.4474	43.2398

## Sheet: Figure 1c
Figure 1C
Mcl expression on BMM
fold change relative to unstimulated control
6h	- IL-4								+ IL-4
TDB	0.771657	0.825479	0.777731	0.881815	1.26314	0.878706	0.811375	0.820619	0.163972	0.173546	0.16854	0.169927	0.148306	0.141406	0.153134	0.156974
BCG	2.3325	2.369	1.973	2.0232	1.74394	1.72577	1.57509	1.51507	0.735044	0.795764	0.609534	0.65212	0.597076	0.633208	0.458201	0.42956
24h
TDB	1.66687	2.0104	1.11371	0.967779	2.2197	1.93259	2.5241	2.33803	0.415072	0.372963	0.340558	0.410312	0.529051	0.658425	0.661762	0.71667
BCG	5.15131	4.58431	4.79543	10.3504	5.4393	5.18747	4.99092	5.44862	2.37779	2.52796	2.5108	2.15547	2.93834	1.97808	2.85536	3.10441
48h
TDB	3.27558	2.92584	2.47029	2.88202	3.97335	3.57122	4.66329	5.09125		0.0152921		0.40533	0.467383	0.509787	0.635161	0.755287
BCG	6.90371	8.31827	6.56981	7.22596	8.6869	9.66298	8.64211	9.33164	3.25717	3.20697	3.51913	3.83589	3.01946	3.36322	3.9037	3.79872

## Sheet: Figure 1d
Figure 1D
Dectin-1 expression on BMM
fold change relative to unstimulated control
6h	- IL-4								+ IL-4
TDB	0.502546	0.566377	0.561714	0.699277	0.897265	0.714583	0.534046	0.549773	2.04493	2.17517	2.26686	2.3904	3.56745	3.24326	3.40213	3.43942
BCG	0.486061	0.540359	0.436566	0.456487	0.641295	0.593489	0.535791	0.568677	3.56015	3.59509	2.82967	2.73999	4.5575	4.47763	4.58339	4.08853
24h
TDB	0.812381	1.05376	0.729705	0.552807	0.668797	0.6235	0.875197	0.74045	3.16037	3.1409	2.81339	3.44445	3.42261	3.86391	3.7722	3.81753
BCG	0.440724	0.356461	0.277697	0.626974	0.333941	0.327827	0.34191	0.37285	4.22142	3.8207	3.8907	3.78402	5.15867	5.10761	5.55782	5.90257
48h
TDB	1.47169	1.34145	0.959004	1.09053	1.05166	1.06259	1.71395	1.77786		4.89734		4.65253	5.56408	6.15852	8.00149	8.48409
BCG	0.812156	0.828743	0.516786	0.550901	0.416766	0.353517	0.417849	0.476805	7.65677	7.54612	6.89117	7.42019	7.19053	8.22647	10.1272	8.28744

## Sheet: Figure 1e
Figure 1E
Mincle surface expression on BMM after BCG infection
deltaMFI	w/o IL-4												+IL-4
Mock	17.6167	15.3167	19.1667	61.3333	26.3333	12.8333	15.7	16.5	51.5	53	43.9	48.9	27.9667	28.9667	24.9667	34.3333	20.8333	49.3333	16.5	18.5	53.5	53.5	36.9	40.4
MOI 0,4	94.4667	84.4667	95.9667				92.7	100.7			496.4	492.4	26.9667	32.4667	34.9667				28.25	32.2			101.4	105.9
MOI 2	244.467	238.967	249.467	734.833	841.833	1485.83	194.7	205.2	919	933.5	555.4	555.9	162.467	153.967	138.467	644.833	672.833	1093.83	85.2	91.2	441.5	465.5	296.9	318.4
MOI 10	307.467	278.967	269.467	851.333	889.333	1326.83	261.2	236.7	654.5	794	380.4	426.4	263.967	244.467	280.967	597.333	683.833	734.333	194.7	219.2	557	515	300.9	295.9

## Sheet: Figure 1f
Figure 1F
Dectin-2 surface expression on BMM after BCG infection
deltaMFI	w/o IL-4								+IL-4
Mock	68.05	60.55	60.05	182.333	141.333	120.833	60.6	27.5	42.55	43.55	45.55	103.333	86.8333	124.833	38.6	40.6
MOI 0,4	79.05	62.05	57.55				55.1	67.1	35.05	45.05	47.55				35.1	41.6
MOI 2	74.05	59.05	66.05	145.333	169.333	258.333	80.1	49.6	33.05	35.55	58.55	90.3333	151.333	406.833	35.1	38.6
MOI 10	207.55	185.55	176.05	241.333	276.833	413.833	76.1	72.1	95.55	105.55	121.05	100.333	123.833	224.833	50.1	47.1

## Sheet: Figure 1g
Figure 1G
Dectin-1 surface expression on BMM after BCG infection
deltaMFI	w/o IL-4								+IL-4
Mock	383.667	375.667	296.167	763.833	737.333	483.333	363.9	335.9	2516.67	2839.67	2954.67	5955.33	4309.33	4796.33	2154.9	2419.9
MOI 0,4	195.167	182.667	131.667				117.9	138.9	1728.67	2169.67	2211.67				1377.4	1732.9
MOI 2	51.6667	38.6667	34.6667	116.333	51.3333	53.3333	53.9	18.95	632.667	853.667	861.667	2130.33	1821.83	1707.83	937.9	1101.4
MOI 10	53.1667	47.6667	51.6667	77.3333	55.3333	65.8333	17.85	38.9	576.667	732.667	725.167	1397.83	1039.83	786.833	470.9	558.4
