# Supplementary material for: IL-4 and helminth infection downregulate MINCLE-dependent macrophage response to mycobacteria and Th17 adjuvanticity
Source: eLife. 2023 Feb 8;12:e72923. doi: 10.7554/eLife.72923 (PMC9908076; doi:10.7554/eLife.72923)
Supplement: Figure 2—source data 1. [file elife-72923-fig2-data1.xlsx]

## Sheet: Figure 2a
Figure 2A
% BCG+ cells
MOI	w/o							IL-4 treated
Non inf.	0.35	0.31	0.59	0.66	0.4	0.39		1.04	1.02	0.77	1.08
20	70.5	71.3	61.5	63.8	62.6	64.2		62.4	52.4	62.5	67.4	65.4
10	45	35.4	44.5	41	44.7	46.5	45.5	39.2	46	44.1	50.3	47.7
2	8.46	8.41	8.38	7.8	9.58	9.89		10.2	9.01	8.48	8.55	12	12

## Sheet: Figure 2b
Figure 2B
G-CSF
ng/ml	w/o							+ IL-4
WT	14.3	12.7	12.1	11.6	5.31	4.95		2.13	2.2	1.07	0.991	0.46	0.87
Clec4e-/-	3.04	3.15	3.6	2.7	1.47	1.75		0.675	0.738	0.56	0.78	0.11	0
Fcerg1-/-	3.94	3.44	1.8	2.3	1.31	1.99		0.99	1.34	0.45	0.37	0.357	0
TNF
ng/ml	w/o							+ IL-4
WT	4.01	4.25	11.04	9.75	6.608	6.131		2.88	2.965	2.96	2.806	3.812	4.696
Clec4e-/-	0.72	0.68	2.71	2.73	4.48	4.535		1.298	1.217	3.814	3.676	4.199	4.296
Fcerg1-/-	0.64	0.56	2.34	2.77	4.54	5.8		1.493	1.859	2.098	2.202	2.48	3.09

## Sheet: Figure 2c
Figure 2C
Phagocytosis
	w/o		+ IL4
WT	52.7	56.2	51	51.2
Clec4e-/-	56.5	57.9	54.7	57.8
Fcerg1-/-	56.7	56.9	60	56.6
