# Supplementary material for: IL-4 and helminth infection downregulate MINCLE-dependent macrophage response to mycobacteria and Th17 adjuvanticity
Source: eLife. 2023 Feb 8;12:e72923. doi: 10.7554/eLife.72923 (PMC9908076; doi:10.7554/eLife.72923)
Supplement: Figure 3—source data 1. [file elife-72923-fig3-data1.xlsx]

## Sheet: Figure 3a
Figure 3a
IL-4 in serum (ng/ml)
0.5 µg	0.25 µg	naive
1.80112	0.147465	not detectable
1.82496	1.49795	not detectable
1.34062	1.35176	not detectable
2.05826	1.27317	not detectable
1.39648	0.701425	not detectable
2.57537		not detectable

## Sheet: Figure 3c
Figure 3C
Ly6Chi monocytes
delta MFI	control (Ringer)							IL4-treated
BCG inf	309.1	95	266	458.1	444.3	374		87.6	20.5	99.3	21	35	53.9	44.4
PBS	-25.3	185.2		-4.1	-1			-44.9	-28.9		17	29
neutrophils
delta MFI	control (Ringer)							IL4-treated
BCG inf	342.2	238.1	283.4	502.1	432.9	463.2		318.9	124.5	291.2	323.34	262	282.44	243
PBS	67.7	193.4		59.8	22.4			51.6	73.9		32	156.3

## Sheet: Figure 3d
Figure 3D
relative % cells
eosinophils				neutrophils				Ly6Chi monocytes				Ly6Clo monocytes
BCG inf	N.b. + BCG inf	BCG inf (Mincle-/-)		BCG inf	N.b. + BCG inf	BCG inf (Mincle-/-)		BCG inf	N.b. + BCG inf	BCG inf (Mincle-/-)		BCG inf	N.b. + BCG inf	BCG inf (Mincle-/-)
9	37.8	12.7		43	56.1	53.3		48.3	31.3	33.9		3.53	7.61	6.75
8.18	52.7	10.6		54.5	70.4	63.1		32.7	18.1	21.7		8.07	5.71	3.75
11.5	34.2	14.7		56.8	56.9	56.3		34.2	32.5	25.1		5.36	5.77	3.29
11	36.5			52.2	58.2			39.1	26.5			4.83	7.31
14.9	19.2			61.1	69.9			25.2	19.5			4.38	3.74
16.6	24.8			51	67.6			25.9	18.4			3.52	4.53
21.2	38.1			71.5	53.8			12.8	25.6			3.84	6.12
10	57.2			39.3	60			43.3	11.9			5.92	10.1
6.71	19.6			50.1	79.4			25	15.5			1.61	1.89
9.22	30.3			63.5	75.5			36.6	16.8			2.12	2.5
6.61	34.4			63.5	77			26.6	15.3			1.55	2.73
17.4	87				15.2				2.67				32.8
6.78	22.7			75.9	68.1			14.7	22			1.33	1.74

## Sheet: Figure 3e
Figure 3E
Mincle expression
deltaMFI normalized to mean of BCG-infected mice
BCG inf	N.b. + BCG inf	BCG inf (Mincle-/-)
0.977859	0.789809	-0.0473157
1.02032	0.445253	0.0270498
0.765544	0.559296	0.0409542
1.23628	0.230513
0.901012	0.829009
0.900623	0.450701
1.19837	0.635768
1.16917	0.289569
0.418066	1.13695
1.2937	0.534276
	0.505171
1.11907	-0.00787901
	0.861494

## Sheet: Figure 3f
Figure 3f
% BCG+ monocytes
BCG inf	N.b. + BCG inf
3.95	11.1
14.4	6.11
9.95	7.93
15	4.67
8.02	12.8
10.2	4.89
	6.59
9.98	1.9
21.5	27.3
6.26	14
30.9	24.1
	77.9
21.8	16.5
