# Supplementary material for: IL-4 and helminth infection downregulate MINCLE-dependent macrophage response to mycobacteria and Th17 adjuvanticity
Source: eLife. 2023 Feb 8;12:e72923. doi: 10.7554/eLife.72923 (PMC9908076; doi:10.7554/eLife.72923)
Supplement: Figure 4—source data 1. [file elife-72923-fig4-data1.xlsx]

## Sheet: Figure 4b
Figure 4B
IL-4
dLN
ng/ml	non inf. + CAF01													S.m. inf + CAF01
Mock	0.00644133	0	0	0	0	0	0	0	0	0.028066	0.0409407	0.0561127	0.0259453	0	0	0	0	0	0.0534907	0.0160693	0.0559327	0.0591247	0	0	0	0
H1	0	0	0	0	0	0.0333333	0	0	0	0.0346733	0.01859	0.061862	0.0255447	0	0	0	0	0	0.0309573		0.06067	0.0629987	0	0	0	0
anti-CD3	0	0	0	0	0	0	0	0	0	0.0431727	0.0526427	0.05906	0.0715387	0	0	0	0	0	0.0301513	0.077636	0.0692073	0.04373	0	0	0	0
spleen
ng/ml	non inf. + CAF01													S.m. inf + CAF01
Mock	0	0	0	0.0141193	0.025078	0	0.0709313	0.0118053	0.0380547	0.005726	0	0	0	0	0	0	0	0	0	0	0.008614	0.0145393	0.0402087	0	0	0
H1	0	0.0419227	0	0	0	0.0267553	0	0.088304	0.0560587	0.0127407	0	0.003756	0.000748667	0.123462	0.00602533	0.0516973	0	0	0.0677387	0.00342	0.0277387	0.05422	0	0	0	0
anti-CD3	0	0	0	0.051486	0	0	0.0546073	0	0	0.009872	0	0.025288	0	0.39495	0.340604	0.259708	0.342024	0.494746	0.261039	0.240106	0.383147	0.408129	0.274845	0.233145	0.517001	0.186268

## Sheet: Figure 4c
Figure 4C
dLN
IL-17
pg/ml	non inf + H1/CAF01																		Sm inf + H1/CAF01
Mock	0	0	0	0	0	0	0	0	2678.42	23.5	3371.22	0.47	31.15	792.773	277.623	0	304.007	124.73	0	0	0	0	0	0	0	0	0	712.427	0	0	131.523	0	387.267	132.77	46.3333
H1	8541.82	5912.44	4223.15	3990.29	20688.7	4634.12	4487.26	6462.01	27104.4	13670.1	2963.73	4077.47	7119.12	18445.2	6036.72	7752.5	7282.48	31100.6	2279.81	1101.91	6682.53	9393.87	2992.41	8296.03	3834.16	5289.9	23408.9	45545.2	17175.9	3997.76	10872.9	9273.03	20068	12967	16148.4
anti-CD3	10340.5	9897.25	3178.03	7409.99	19938.2	5084.35	11182.1	13205	22040.7	7643.02	7271.85	16192.7		12957.4	8276.38	4268.09		9146.25	5139.65	2526.31	12805.8	13793.4	2223.16	17710.9	5696.15	6209.72			23111.3	3546.07	11692.5	6956.69	16872	15670.4	10819.2
IFNg
pg/ml	non inf + H1/CAF01																		Sm inf + H1/CAF01
Mock	0	0	0	0	308.343	0	0	0	8603.08	19.66	3649.46	5.82		841.557	649.97	79.3	681.547	124.73	0	0	363.613	0	0	170.107	26.37	0	40.44	345.38	81.4	97.16	2247.52	12.9067	2911.46	444.027	288.3
H1	18306.8	11562.1	3210.76	3462.68	21701.2	19510.7	17426.5	16652.6	41818.3	41751.5	7507.42	22413.8	25571.1	34495.2	23346.5	21661.8	20477.8	31100.6	18445.2	4952.29	17706	16795.2	12190.9	22474.6	9082.67	15869.1	47653.5	33134.1	19519.9	17581.6	31153.2	21757.6	22690.8	23429.8	22148
anti-CD3	5569.98	1428.63	665.92	1233.88	6965.69	4815.32	5729.47	4515.73	10815.2	5566.66	4336.46	4682.72	2940.88	10704.3	4649.97	1794.84	4951.19	9146.25	6998.04	354.223	8617.26	3575.99	1253.01	5720.49	1304.34	1670.58	3119.42	3971.88	1772.8	1287.94	10890.2	3196.02	9898.74	9759.49	6920.32
IL-10
pg/ml
	non inf + H1/CAF01																		Sm inf + H1/CAF01
Mock	0	0	0	0	0	0	0	0	71.085	49.605	61.2783	0	26.74	0	0	0	0	0	0	0	0	0	0	0	0	0	0	0	0	0	0	0	0	0	0
H1	1115.8	732.973	478.933	659.788	808.082	1310.62	964.502	833.71	481.758	786.027	55.4467	474.018	482.517	595.857	651.777	1186.03	896.072	1040.87	749.91	226.697	644.017	1033.04	785.158	935.485	364.918	603.578	762.467	394.573	613.967	604.68	1134.76	793.23	890.667	483.79	945.248
anti-CD3	0	0	0	0	0	0	0	0	0	73.1633	53.4417	51.3933	62.2433	0	0	0	4.47833	0	54.9683	0	0	69.435	88.815	0	0	80.3433	13.7467	0	0	0	33.0967	0	0	0	0

## Sheet: Figure 4d
Figure 4D
splenocytes
IL-17
pg/ml	non inf + H1/CAF01																		Sm inf + H1/CAF01
Mock	0	0	0	0	0	0	0	0		0	0	0	0	0	0	0	0	0	0	0	0	0	0	0	0	0	0	0	0	0	0	0	0	0	0
H1	3900.5	4394.67	3252.24	3323.8	7248.6	3040.88	1807.15	1875.47	14202.6	9249.05	5966.41	1977.78	11106.5	4553.97	1285.73	2826.36	2996.44	1590.36	233.22	227.31	258.07	1001.35	432.09	1020.94	332.45	2218.94	1896.07	1632.68	1748.34	1623.85	115.35	425.56	901.9	44.35	219.42
anti-CD3	2090.12	1978.74	2157.73	1642.23	2634.37	1042.05	1301.42	1573.63	4700.97	4152.8	3360.33	2890.15	3396.7	1897.78	790.777	1545.86	1541.67	1599.43	356.463	1089	618.753	1929.25	1307.4	2925.48	861.343	2688.77	4376.86	3094.92	2108.26	2902.43	663.15	2010.9	3525.23	630.62	238.72
IFNg
pg/ml	non inf + H1/CAF01																		Sm inf + H1/CAF01
Mock	0	0	0	0	0	0	0	0	0	201.253	14.5867	5.44667	26.5133	145.337	293.86	114.543	62.4067	134.137	0	0	0	0	0	0	0	39.79	0	0	0	0	186.25	171.683	167.123	144.3	148.283
H1	17608.3	18873.7	5544.64	4074.18	26007	14798.8	14646.1	15520.2		13108	9104.79	4648.91	20346.7	29521.7	33462.4	19981.6	25136.7	28048.7	8673.16	4671.6	2552.6	5339.19	7159.2	9645.81	3188.22	8771.43	5355.94	3294.64	527.63	5304.09	7627.14	3565.19	3518.46	2616.1	2076.35
anti-CD3	25125.4	23044.3	17245.3	14050.1	19081.6	27394.1	24301.4	2698.5	11799.3	9156.19	5675.04	2987.67	10140	17768.7	20158.3	13130.5	20795.8	22467.6	2698.5	1980.66	2973.39	2483.89	2359.87	3344.86	1641.57	4401.25	1688.24	1558.84	462.38	1741.14	2134.52	1912.11	3064.52	1513.12	1154.97
IL-10
pg/ml	non inf + H1/CAF01																		Sm inf + H1/CAF01
Mock	35.2833	22.5167	23.0417	57.5317	0	0	0	0	70.4533	150.753	0	0	0	0	0	0	0	0	0	0	0	0	0	0	0	0	28.1867	0	0	0	0	0	0	0	0
H1	547.637	856.337	582.505	713.592	1002.88	686.792	1136.3	663.513	414.597	536.302	521.738	316.453	350.597	652.595	928.608	838.172	1293.01	821.62	167.442	125.663	54.8767	313.455	518.225	474.452	178.697	728.81	215.27	250.852	104.867	389.527	200.027	0	34	0	0
anti-CD3	178.978	132.885	141.227	157.14	122.572	0	133.79	34.02	76.925	107.26	40.955	119.897	177.747	35.6983	80.0717	53.5333	0	119.755	1123.92	1238.79	1356.56	1767.66	1213.23	1376.26	2183.77	1410.97	917.3	827.403	602.442	312.013	1455.55	1675.51	995.74	1590.78	2014.94

## Sheet: Figure 4e
Figure 4E
dLN
IL-17
pg/ml	non inf + H1/CpG					Sm + H1/CpG
Mock	0	0	0	0	0	0	0	0	0	0
H1	0	0	0	26.2833	0	93.8733	32.2	0	0	0
anti-CD3	5633.9	1757.9	5732.27	1699.18	5745.02	6653.5	3725.83	910.46	1386.96	1527.38
IFNg
	non inf + H1/CpG					Sm + H1/CpG
Mock	811.467	97.6933	124.633	161.583	190.227	377.033	922.657	176.987	81.0467	144.157
H1	4695.93	2676.15	3097.26	5685.53	3640.7	15877.2	2845.72	512.687	908.46	2464.96
anti-CD3	16526.3	7869.5	10588.3	12760	12642.2	12277.2	10511	7291.92	8473.82	10944.3

## Sheet: Figure 4f
Figure 4F
splenocytes
IL-17
pg/ml	non inf +H1/CpG					Sm + H1/CpG
Mock	0	0	0	0	0	0	0	0	0	0
H1	22.5467	0	0	28.2867	0	0	0	0	0	0
anti-CD3	1901.45	444.163	656	977.467	948.1	988.33	305.35	459.4	410.47	805.813
IFNg
pg/ml	non inf +H1/CpG					Sm + H1/CpG
Mock	42.4467	17.57	10.9433	16.1	92.1333	138.167	161.15	162.217	52.7333	47.97
H1	559.617	1811.08	1686.74	1603.91	215.657	505.757	312.267	167.983	37.9767	99.29
anti-CD3	5509.78	7040.99	6829.63	7007.25	4815.02	776.473	663.093	577.6	1293.39	915.577
