# Supplementary material for: IL-4 and helminth infection downregulate MINCLE-dependent macrophage response to mycobacteria and Th17 adjuvanticity
Source: eLife. 2023 Feb 8;12:e72923. doi: 10.7554/eLife.72923 (PMC9908076; doi:10.7554/eLife.72923)
Supplement: Figure 5—source data 1. [file elife-72923-fig5-data1.xlsx]

## Sheet: Figure 5b
Figure 5B
footpad swelling [1/100 mm]
day p. immunization		N.b. inf												non inf.
0		0	0	0	0	0	0	0	0	0	0	0		0	0	0	0	0	0	0	0	0	0
2		67.5	77.5	65	65	57.5	52.5	60	67.5	65	72.5	85		57.5	55	62.5	67.5	60	80	87.5	77.5	77.5	52.5
4		82.5	92.5	80	75	90	87.5	87.5	102.5	85	80	100		95	87.5	75	80	87.5	82.5	87.5	147.5	95	72.5
6		102.5	122.5	120	100	120	100	152.5	105	90.5	177.5	132.5		140	105	140	120	140	122.5	140	130	137.5	105
7		90	60	117.5	80	130	97.5	147.5	100	82.5	125	122.5		130	145	132.5	135	140	140	165	135	162.5	117.5

## Sheet: Figure 5c
Figure 5C
cell numbers (x10e7)
spleen			dLN
non inf.	N.b. inf		Non inf	N.b. inf
	3.32		4.59	1.12
4.175	3.5		3.84	2.35
3.45	3.425		2.46	2.77
3.575	4.725		3.66	2.53
	3.67		3.85	2.92
6.02	8.3		4	2.53
3.77	8.3		3.03	2.16
5.47	4.35		2.41	1.71
8.25	5.45		3.18	2.32
7.7	5.55		4.66	2.68
	5.02			2.38

## Sheet: Figure 5d
Figure 5D
IL-4
ng/ml
dLN	non inf + CAF01									Nippo inf. + CAF01
Mock	0	0.0425687	0	0	0	0.0231367	0.096136	0.028456	0.0226613	0	0	0	0	0	0	0.008266	0	0
H1	0.0344413	0.0356367	0	0	0	0.008148	0.09941	0.04091	0.040644	0	0	0.035702	0.0376667	0	0	0.0143167	0	0
anti-CD3	0.0240753	0.0349487	0	0.0402767	0	0.00591467	0.072896	0.080478	0.040444	0	0	0.0326313	0.023124	0	0	0.0204327	0.0173133	0.0291933
spleen	non inf + CAF01									Nippo inf. + CAF01
Mock	0.028396	0.00426667	0.010526	0.0201033	0.0684873	0.049058	0.0679153	0	0	0.0188153	0.030668	0.00531067	0.0951433	0	0.09345	0.045176	0.049206	0
H1	0.09534	0.04101	0.036392	0.095998	0.150371	0.073562	0.024262	0	0	0.141504	0.161336	0.175618	0.250778	0	0.105184	0.200608	0.22393	0.270508
anti-CD3	0.00817133	0.00906267	0.008768	0.007868	0.074604	0.0183553	0	0	0.110117	0.129018	0.251518	0.288408	0.214342	0.12065	0.159682	0.320424	0.175664	0.250206

## Sheet: Figure 5e
Figure 5E
dLN
IL-17
ng/ml	non inf + CAF01											Nippo + CAF01
Mock	0.211197	0.14483	0.36017	0.550623	0.0727933	0	0.194497	2.11711	0.181233	1.31816		0	0	0	0	0	0	0.00118333	0.56024	0	0	0
H1	12.8283	8.03302	15.182	4.30702	14.7116	13.2451	7.80966	12.6714	6.01082	8.96094		2.87914	8.35708	14.2803	7.60265	8.61567	12.3488	12.4725	14.1174	4.93336	12.2681	13.0757
anti-CD3	30.9182	19.0442	23.8761	13.3668	23.6198	35.6992	26.1984	29.9629	26.5853	28.9011		3.23914	21.1131	15.0286	14.4701	16.5915	36.8098	30.702	31.4615	22.864	23.9655	20.429
IFNg
ng/ml	non inf + CAF01											Nippo + CAF01
Mock	0	0.08246	0.0493333	0.0590767	0.160487	0.167753	0.06287	0	0.0402533	0		0	0	0	0.502573	0	0.244483	0.0237	0.00398	0.06527	0.0497633	0.339447
H1	28.7049	25.2586	30.9782	21.3584	27.8261	19.2537	16.2714	18.6394	13.3069	16.5562		4.65525	33.5937	15.5767	22.2315	24.9065	22.9408	14.6593	17.1933	15.3647	22.4993	18.7916
anti-CD3	7.3813	5.26001	6.43871	3.93158	7.01259	5.9531	6.62208	9.5135	6.59217	6.59606		0.935997	7.09055	4.22703	5.7012	5.05104	10.4987	8.79432	12.3493	3.88272	8.75289	7.34858
IL-10
ng/ml	non inf + CAF01											Nippo + CAF01
Mock	0.111965	0	0.111378	0	0	0.165088	0.0333067	0.0658083	0.031715	0.0259433		0	0.0149617	0	0	0.0468017	0	0.0133817	0.00079833	0	0.01257	0.028675
H1	3.26267	4.50469	2.74364	2.15246	2.60608	1.24532	1.22009	0.946803	0.759315	0.800153		0.692682	2.19228	1.4732	1.71203	2.91058	1.55697	1.11241	0.761085	0.733295	0.93012	1.17365
anti-CD3	0.92594	1.05973	0.46809	0.277523	0.559895	0.240878	0.17335	0.151508	0.102975	0.093085		0.892012	0.172568	0.64045	0.111832	0.332665	0.104815	0.220763	0.0658183	0.099075	0.148915	0.21347

## Sheet: Figure 5f
Figure 5F
splenocytes
IL-17
ng/ml	non inf + CAF01											Nippo + CAF01
Mock	0.36336	0.07082	0	0.423937	0	0.117777	0.310677	0.00756667	0.542667	0		0.367473	0	0	0	0	0	0.00461	0.0624767	0	0	0
H1	5.82018	2.15347	11.6513	4.7717	4.71208	6.07707	9.19393	8.17627	6.50481	8.95034		1.67362	2.33	5.4244	1.81361	0.773577	2.71007	6.02978	2.9789	4.9465	2.38927	3.54626
anti-CD3	5.50317	8.62421	6.09237	9.10572	2.57336	19.5362	12.1073	13.1048	18.5136	13.4125		3.35507	3.93636	7.66166	4.69535	2.62012	14.0023	6.17114	7.55919	7.79808	4.77881	6.72208
IFNg
ng/ml	non inf + CAF01											Nippo + CAF01
Mock	0.05854	0.0956467	0.197783	0.261737	0.111213	0.248517	0	0.00149	1.5407	0		0.00885	0.0570733	0.02768	0.0996867	0.0574033	0	0	0	0.00900667	0	0
H1	18.2287	14.4105	24.1399	19.8022	18.5871	16.5257	16.978	13.2216	18.4383	15.4044		2.57174	12.1072	9.28211	11.274	14.8327	8.46728	3.53756	2.40387	4.77	5.62779	4.74097
anti-CD3	6.36082	8.83989	9.40668	7.3924	6.44369	11.336	9.83008	8.05786	12.5397	11.3071		2.27339	5.92398	3.53601	4.11426	4.54687	9.27745	4.3036	2.36221	7.23116	6.38341	3.93698
IL-10
ng/ml	non inf											N.b. inf
Mock	0	0	0.37588	0.43558	0.0700033	0	0.0333333	0.0368833	0.127975	0		0	0	0	0	0	0.00342833	0.163908	0.0449733	0.09502	0.0535983	0
H1	6.50992	6.71402	5.9075	5.13319	5.87387	2.44118	3.70501	2.88764	1.58105	2.13711		2.67842	5.0053	4.57245	5.78325	4.64476	1.58737	1.49271	0.803653	2.14588	1.31627	2.7661
anti-CD3	0.545032	1.61742	1.73176	0.87865	0	0.229625	0.725682	0.298795	0.15718	0.23435		1.94873	2.03018	1.60811	1.88539	1.34272	0.282902	1.03719	0.795933	0.464767	0.473595	0.840348

## Sheet: Figure 5g
Figure 5G
splenocytes
IL-17
ng/ml	non inf + G3D6A														Nippo + G3D6A
Mock	0	0.080095	0	0	0	0	0	0	0.01338	0	0	0	0	0	0	0.0320017	0	0.0664433	0	0	0	0.002885	0	0.00312167	0.009445	0	0	0
H1	0.163195	0.10439	0.0445333	0.199975	0.154545	0.33209	1.20426	0.113335	0.37245	1.0519	0.98765	0.973137	0.615528	0.0141567	1.16616	0.067615	0.46564	0.0445717	0.15454	0.046425	1.52171	0.20453	0.19241	0.932557	0.50859	0.480247	0.853787	0.635733
anti-CD3	0.53966	0.887955	0.457455	0.22394	0.66709	0.402295	1.09915	0.852705	0.680025	3.24092	1.69429	1.90941	1.68979	0.421563	0.437055	0.065855	0.40806	0.047345	0.544185	0.517235	0.52005	0.580525	0.303685	0.734792	1.39066	1.19554	1.58486	1.62641
IFNg
	non inf + G3D6A														Nippo + G3D6A
Mock	0.14624	0.07843	0.10465	0.12938	0.53169	0.14817	0.30657	0.1889	0.15222	0.138477	0.363617	0.117537	0.0636733	0.161497	0.07426	0.08189	0.15223	0.14613	0.07983	0.10889	0.20284	0.04406	0.08128	0.252777	0.19679	0.0312333	0.35036	0
H1	8.30416	3.32838	1.51636	1.72359	1.88428	3.3733	10.436	4.81877	3.35937	8.07983	2.14427	4.65577	14.1076	4.594	0.99365	0.83428	1.82003	0.11806	2.41244	0.84797	1.31036	0.33681	0.44746	2.4331	2.14421	4.00722	4.66475	4.84645
anti-CD3	8.35945	6.13714	8.01902	11.5846	5.51441	5.18882	12.7121	7.67264	5.92201	8.06856	8.56145	11.6526	11.0532	6.49628	1.7347	2.83624	3.08757	2.76167	3.65571	1.49059	1.15913	1.13925	1.11134	8.288	4.67155	6.15539	5.84092	6.92764
IL-10
	non inf + G3D6A														Nippo + G3D6A
Mock	0.000151824	0	0	0	7.5938e-05	0.000100432	0.000110342	0.00024094	4.842e-05	3.64933e-06	3.8608e-06	0	0.0357267	0.09501	0.0332807	0	0.031424	0.127764	0.110018	0.117178	0.113076	0.21302	0.137266	0.034368	0.0733853	0	0.110191	0
H1	2.29985	1.90591	1.19273	1.26887	1.38342	2.35266	2.24286	3.07812	2.03207	2.0672	1.33972	1.82597	1.85492	1.59843	1.61941	0.18867	3.3145	0.173504	1.77825	1.41981	1.02341	2.33021	1.19674	3.52094	2.2195	1.6749	4.09141	0.857131
anti-CD3	0.171472	0.270276	0.0979	0.056016	0.118972	0.12174	0.085484	0.23066	0.161122	0.0961313	0.114006	0.09043	0.102568	0.140323	2.22001	1.61135	0.917164	1.42602	1.04822	1.09168	1.45935	1.52317	0.71298	0.430734	0.540053	0.477098	0.541147	0.553941
IL-4
ng/ml	non inf + G3D6A									Nippo + G3D6A
Mock	0	0	0	0	0.00472933	0.0133387	0.046594	0.01896	0	0	0	0	0	0	0.008708	0.010579	0	0.03739
H1	0.063256	0.0679133	0.0303307	0	0.053784	0.113292	0.075784	0	0	0	0	0.164892	0	0.031104	0.118354	0.055798	0.243558	0.01465
anti-CD3	0	0	0	0	0	0.0197673	0.0388673	0	0	0.61318	0.776438	0	0.555482	0.169342	0.404704	0.602312	0.464022	0.291478
