# Supplementary material for: IL-4 and helminth infection downregulate MINCLE-dependent macrophage response to mycobacteria and Th17 adjuvanticity
Source: eLife. 2023 Feb 8;12:e72923. doi: 10.7554/eLife.72923 (PMC9908076; doi:10.7554/eLife.72923)
Supplement: Figure 6—source data 1. [file elife-72923-fig6-data1.xlsx]

## Sheet: Figure 6a
Figure 6A
splenocytes
IFNg
ng/ml									B6 non inf + CAF01															B6 N.b.inf+CAF01																	4-13 KO N.b.inf+CAF01
H1	1.92024	5.17751	7.90014	3.79672	6.37716	15.8751	17.2344	12.7405	21.7338	16.3163	8.9253	12.2635	9.6316	3.24302	8.3236	6.90225	4.14403	3.06314	2.59194	2.37779	1.20659	1.93639	4.00079	3.40113	1.49368	3.828	1.69066	1.51109	2.98476	0.57927	1.39738	0.28929			2.48642	4.28332	1.74425	3.77694	2.8076	6.17517	7.70453	13.8763	19.3439	1.93151	4.24035	1.52688	3.06048	0.98075	9.67362
anti-CD3	5.72322	9.44159	13.6666	4.38583	10.3824	16.7386	14.0562	8.73005	16.7925	12.1213	10.6222	18.2154	18.4941	9.96038	11.2707	8.72112	11.0436	5.47632	3.92355	3.99957	2.06121	3.8468	5.0842	2.9104	2.24123	3.55564	5.75791	4.28027	3.27917	2.0711	3.23943	1.92787			8.83612	11.4079	11.8258	19.2519	14.4541	7.88345	12.4658	14.5059	14.0635	12.2902	12.703	36.1685	14.3681	19.928	56.9917

## Sheet: Figure 6b
Figure 6B
splenocytes
IL-17
ng/ml									B6 non inf + CAF01															B6 N.b.inf+CAF01																	4-13 KO N.b.inf+CAF01
H1	0.945365	0.32103	2.07554	0.717245	1.77505	1.15519	0.906985	0.87081	0.671385	0.74076	0.211535	0.30036	0.195045	0.61919	0.2892	0.122175	0.336345	0.815055	0.25581	0.464195	0.205925	0.33723	0.537375	0.19626	0.190315	0.63619	0.218125	0.225035	0.07559	0.073565	0.301935	0.0642			1.73521	2.85759	1.01631	1.24974	1.23037	3.76062	4.33115	6.70397	5.06468	0.75959	1.0397	0.802175	2.36911	0.830225	1.55158
anti-CD3	5.23817	1.19335	2.42535	2.17402	2.16179	2.8929	1.45629	1.21745	0.76061	0.5651	0.608625	1.27161	0.48055	2.16578	0.942875	1.45912	1.15912	1.60888	1.048	1.02442	1.37871	0.832145	1.22008	0.81409	0.631055	1.33681	0.359015	0.62688	0.17229	0.18867	0.712365	1.23995			1.9745	1.62977	0.65081	0.898695	0.61638	1.29533	1.53172	1.98103	1.29828	0.559655	0.86907	0.631925	1.85463	1.55248	1.50876

## Sheet: Figure 6c
Figure 6C
splenocytes
IL-10
ng/ml									B6 non inf + CAF01															B6 N.b.inf+CAF01																	4-13 KO N.b.inf+CAF01
H1	0.232626	0.433886	0.29169	0.518404	0.441406	1.84754	2.10527	1.54803	2.1105	2.85178	2.49607	2.23549	1.79642	1.73611	1.68924	2.40801	1.43291	0.365622	0.281298	0.495348	0.188768	0.233128	1.16541	0.52593	0.676476	0.600976	0.104	0.573096	1.13856	0.00954	0.41422	0.256086			0.161788	0.267992	0.125748	0.195386	0.183674	0.147538	0.19361	0.197882	0.293356	0.003402	0.08628	0.335602	0.436224	0.192426	0.697152
anti-CD3	0.100696	0.080798	0.076972	0.082456	0.0912	0.116824	0.087482	0.078044	0.124242	0.107192	0.089638	0.08543	0.079034	0.13081	0.16508	0.15864	0.112384	0.351678	0.317678	0.31108	0.641758	0.326098	0.577428	0.686778	0.815584	0.351494	0.815202	1.04597	0.93143	0.824756	1.27306	1.86507			0.310004	0.219858	0.16916	0.182206	0.077724	0.088096	0.132664	0.1277	0.155364	0.055916	0.210772	0.10231	0.224052	0.288454	0.48418

## Sheet: Figure 6d
Figure 6D
splenocytes
IL-4
ng/ml									B6 non inf + CAF01															B6 N.b.inf+CAF01																	4-13 KO N.b.inf+CAF01
H1	0.069678	0.106936	0	0.090396	0.0314693	0.311906	0.223884	0.267076	0.189922	0	0.0661773	0	0	0	0	0	0.0583313	0.154218	0.1384	0.06795	0.084784	0.11057	0.208986	0.352382	0.180068	0.27327	0	0.0950873	0.310588	0	0	0.120784			0	0	0	0	0	0	0	0.0154747	0	0	0	0	0	0	0
anti-CD3	0.0345247	0	0	0	0.00630533	0	0.093838	0.0697247	0	0	0	0	0	0	0	0	0	0.173406	0.192818	0.15815	0.247474	0.181052	0.269702	0.504182	0.495164	0.239266	0.112816	0.222444	0.276296	0.234866	0.28359	0.597544			0	0	0	0	0	0	0.0380273	0.0602107	0	0	0.028193	0	0	0.016858	0
